# Supplementary material for: (+)-Lipoic acid reduces mitochondrial unfolded protein response and attenuates oxidative stress and aging in an in vitro model of non-alcoholic fatty liver disease
Source: Springer Nature journal article supplement (doi:10.1186/s12967-024-04880-x), 2024-01-20

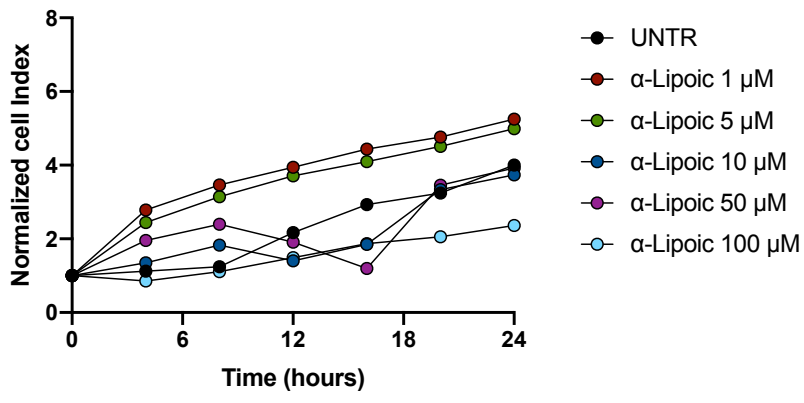

Supplement: MOESM5 [file 26646582]
