# Supplementary material for: (+)-Lipoic acid reduces mitochondrial unfolded protein response and attenuates oxidative stress and aging in an in vitro model of non-alcoholic fatty liver disease
Source: Springer Nature journal article supplement (doi:10.1186/s12967-024-04880-x), 2024-01-20
Supplement: MOESM6 [file 26646582]

**Table S1. RPKM values obtained from sequencing**

| Name   | CTRL     | CTRL     | CTRL     | PA:OA + $\alpha$ -Lipoic 1 $\mu$ m | PA:OA + $\alpha$ -Lipoic 1 $\mu$ m | PA:OA + $\alpha$ -Lipoic 1 $\mu$ m | PA:OA + $\alpha$ -Lipoic 5 $\mu$ m | PA:OA + $\alpha$ -Lipoic 5 $\mu$ m | PA:OA + $\alpha$ -Lipoic 5 $\mu$ m | PA:OA    | PA:OA    | PA:OA    |
|--------|----------|----------|----------|------------------------------------|------------------------------------|------------------------------------|------------------------------------|------------------------------------|------------------------------------|----------|----------|----------|
| GPX1   | 54806,43 | 53479,69 | 54143,06 | 83989,36                           | 70097,41                           | 77043,39                           | 73359,47                           | 69733,66                           | 71546,56                           | 72228,92 | 64452,72 | 68340,82 |
| NQO1   | 38468,81 | 37363,06 | 37915,94 | 39602,18                           | 36045,72                           | 37823,95                           | 39432,21                           | 43694,07                           | 41563,14                           | 44052,89 | 54418,03 | 49235,46 |
| SOD1   | 38151,99 | 43025,63 | 40588,81 | 38172,44                           | 45522,06                           | 41847,25                           | 40118,95                           | 40012,89                           | 40065,92                           | 41485,91 | 38743,87 | 40114,89 |
| PARK7  | 23868,72 | 27057,29 | 25463,01 | 21982,57                           | 21761,71                           | 21872,14                           | 21701,4                            | 22726,2                            | 22213,8                            | 25868,49 | 23327,1  | 24597,8  |
| TXN    | 22864,96 | 22633,35 | 22749,16 | 25099,01                           | 20375,54                           | 22737,28                           | 22376,48                           | 25096,66                           | 23736,57                           | 21206,59 | 34342,55 | 27774,57 |
| PRDX3  | 17277,44 | 17220,87 | 17249,15 | 16616,35                           | 16304,13                           | 16460,24                           | 17394,77                           | 18851,25                           | 18123,01                           | 15745,23 | 18152,92 | 16949,08 |
| HMOX1  | 10690,71 | 11993,38 | 11342,05 | 15018,07                           | 14398,36                           | 14708,21                           | 14065,69                           | 13082,74                           | 13574,21                           | 14137,22 | 12472,08 | 13304,65 |
| TXN2   | 9130,892 | 8987,884 | 9059,388 | 14334,42                           | 11215,07                           | 12774,75                           | 10759                              | 10203,18                           | 10481,09                           | 8778,076 | 9434,859 | 9106,467 |
| SOD2   | 6946,713 | 6909,628 | 6928,17  | 6394,07                            | 7775,051                           | 7084,561                           | 5831,835                           | 5230,129                           | 5530,982                           | 5237,199 | 3753,088 | 4495,144 |
| GCLC   | 5548,713 | 5586,15  | 5567,432 | 3259,549                           | 5548,557                           | 4404,053                           | 5712,122                           | 5587,535                           | 5649,829                           | 6253,247 | 4215,977 | 5234,612 |
| SRXN1  | 4232,966 | 3136,911 | 3684,938 | 4917,154                           | 5363,789                           | 5140,472                           | 5032,918                           | 5449,179                           | 5241,048                           | 5115,102 | 4386,095 | 4750,599 |
| CAT    | 3979,379 | 3545,419 | 3762,399 | 5930,653                           | 5007,703                           | 5469,178                           | 5159,663                           | 5920,622                           | 5540,142                           | 4489,161 | 5757,382 | 5123,271 |
| GCLM   | 2596,908 | 2085,264 | 2341,086 | 1755,865                           | 1628,91                            | 1692,387                           | 2104,548                           | 2206,933                           | 2155,74                            | 2043,877 | 2195,373 | 2119,625 |
| IDE    | 1588,177 | 1581,648 | 1584,912 | 1215,876                           | 1068,35                            | 1142,113                           | 1249,253                           | 1193,335                           | 1221,294                           | 1152,107 | 1485,134 | 1318,62  |
| PRDX1  | 1520,371 | 1530,965 | 1525,668 | 1068,076                           | 963,3559                           | 1015,716                           | 1122,688                           | 1010,335                           | 1066,511                           | 900,1999 | 1033,547 | 966,8732 |
| HMBS   | 1478,996 | 1508,422 | 1493,709 | 1490,005                           | 1354,002                           | 1422,003                           | 1413,956                           | 1551,318                           | 1482,637                           | 1355,302 | 1271,12  | 1313,211 |
| MRPL13 | 183,9251 | 185,497  | 184,7111 | 87,2863                            | 78,97632                           | 83,13131                           | 117,2711                           | 125,1155                           | 121,1933                           | 134,5396 | 203,808  | 169,1738 |
| TNF    | 114,164  | 94,70653 | 104,4353 | 144,9328                           | 185,3745                           | 165,1537                           | 104,46                             | 98,84666                           | 101,6533                           | 45,66953 | 63,994   | 54,83176 |
| GSTP1  | 26,40229 | 59,36845 | 42,88537 | 113,2436                           | 104,7659                           | 109,0047                           | 65,48257                           | 48,54711                           | 57,01484                           | 1250     | 1337,192 | 1293,596 |

Oxidative Stress

| Name         | CTRL     | CTRL     | CTRL     | PA:OA + $\alpha$ -Lipoic 1 $\mu$ m | PA:OA + $\alpha$ -Lipoic 1 $\mu$ m | PA:OA + $\alpha$ -Lipoic 1 $\mu$ m | PA:OA + $\alpha$ -Lipoic 5 $\mu$ m | PA:OA + $\alpha$ -Lipoic 5 $\mu$ m | PA:OA + $\alpha$ -Lipoic 5 $\mu$ m | PA:OA    | PA:OA    | PA:OA    |
|--------------|----------|----------|----------|------------------------------------|------------------------------------|------------------------------------|------------------------------------|------------------------------------|------------------------------------|----------|----------|----------|
| <b>BAX</b>   | 14222,6  | 13078,66 | 13650,63 | 12276,22                           | 9639,263                           | 10957,74                           | 12533,39                           | 12377,45                           | 12455,42                           | 11183,97 | 10530,54 | 10857,25 |
| <b>LRP1</b>  | 1971,642 | 1952,663 | 1962,152 | 1338,392                           | 1346,514                           | 1342,453                           | 1676,23                            | 1803,19                            | 1739,71                            | 1567,646 | 1895,734 | 1731,69  |
| <b>KEAP1</b> | 1957,078 | 1652,697 | 1804,887 | 2227,384                           | 1792,733                           | 2010,058                           | 1848,97                            | 1818,419                           | 1833,694                           | 1506,014 | 1473,399 | 1489,706 |
| <b>BCL2</b>  | 5,850628 | 0,828327 | 3,339477 | 4,06288                            | 4,977772                           | 4,520326                           | 4,568165                           | 4,987716                           | 4,777941                           | 3,994371 | 0        | 1,997185 |

## Apopstpsis

| Name          | CTRL     | CTRL     | CTRL     | PA:OA + $\alpha$ -Lipoic 1 $\mu$ m | PA:OA + $\alpha$ -Lipoic 1 $\mu$ m | PA:OA + $\alpha$ -Lipoic 1 $\mu$ m | PA:OA + $\alpha$ -Lipoic 5 $\mu$ m | PA:OA + $\alpha$ -Lipoic 5 $\mu$ m | PA:OA + $\alpha$ -Lipoic 5 $\mu$ m | PA:OA    | PA:OA    | PA:OA    |
|---------------|----------|----------|----------|------------------------------------|------------------------------------|------------------------------------|------------------------------------|------------------------------------|------------------------------------|----------|----------|----------|
| <b>TGFB1</b>  | 10787,01 | 10153,11 | 10470,06 | 11641,21                           | 11473,66                           | 11557,44                           | 11908,12                           | 12330,37                           | 12119,25                           | 10646,87 | 11714,68 | 11180,78 |
| <b>IL8</b>    | 6485,508 | 7572,044 | 7028,776 | 7584,181                           | 11018,77                           | 9301,476                           | 7521,909                           | 6702,447                           | 7112,178                           | 9101,58  | 7766,556 | 8434,068 |
| <b>TGFBR2</b> | 5988,239 | 5494,747 | 5741,493 | 4352,197                           | 4427,503                           | 4389,85                            | 4861,456                           | 4504,333                           | 4682,895                           | 5202,066 | 4385,312 | 4793,689 |
| <b>IL1RN</b>  | 3865,637 | 4030,603 | 3948,12  | 2894,214                           | 2891,06                            | 2892,637                           | 2826,148                           | 2851,919                           | 2839,034                           | 2980,818 | 2382,689 | 2681,753 |
| <b>VEGFB</b>  | 3725,918 | 4740,185 | 4233,052 | 4172,499                           | 3159,187                           | 3665,843                           | 3999,763                           | 4082,263                           | 4041,013                           | 5172,438 | 6829,686 | 6001,062 |

|               |          |          |          |          |          |          |          |          |          |          |          |          |
|---------------|----------|----------|----------|----------|----------|----------|----------|----------|----------|----------|----------|----------|
| <b>NFE2L2</b> | 3427,974 | 3829,683 | 3628,828 | 3523,836 | 2994,311 | 3259,073 | 4084,785 | 3110,216 | 3597,501 | 2688,758 | 2318,055 | 2503,407 |
| <b>NFKB1</b>  | 1910,771 | 1736,192 | 1823,481 | 1689,242 | 1585,457 | 1637,349 | 1601,612 | 1555,358 | 1578,485 | 1458,178 | 1697,002 | 1577,59  |
| <b>CSF3</b>   | 309,7407 | 263,1169 | 286,4288 | 131,8624 | 203,786  | 167,8242 | 102,5214 | 122,4612 | 112,4913 | 89,64394 | 96,62517 | 93,13456 |
| <b>CSF2</b>   | 84,00096 | 48,6523  | 66,32663 | 119,3179 | 139,225  | 129,2715 | 76,02232 | 48,82611 | 62,42422 | 107,5305 | 136,9782 | 122,2543 |
| <b>IL10</b>   | 18,13754 | 9,629614 | 13,88358 | 6,29767  | 11,02257 | 8,66012  | 5,310665 | 8,590236 | 6,950451 | 19,34837 | 18,07448 | 18,71142 |
| <b>CCL2</b>   | 7,986654 | 5,653718 | 6,820186 | 11,09242 | 14,56098 | 12,8267  | 6,235973 | 3,782611 | 5,009292 | 13,63172 | 31,83554 | 22,73363 |
| <b>CCL5</b>   | 1,977295 | 0        | 0,988648 | 4,119309 | 7,209869 | 5,664589 | 46,31612 | 30,90383 | 38,60997 | 0        | 47,2901  | 23,64505 |
| <b>IL1B</b>   | 0,965656 | 2,050751 | 1,508204 | 16,09404 | 15,84494 | 15,96949 | 11,30975 | 5,488206 | 8,398978 | 80       | 115,4758 | 97,73791 |

### Immunoregulation and Infl

|             | CTRL     | CTRL     | CTRL     | PA:OA + $\alpha$ -Lipoic 1 $\mu$ m | PA:OA + $\alpha$ -Lipoic 1 $\mu$ m | PA:OA + $\alpha$ -Lipoic 1 $\mu$ m | PA:OA + $\alpha$ -Lipoic 5 $\mu$ m | PA:OA + $\alpha$ -Lipoic 5 $\mu$ m | PA:OA + $\alpha$ -Lipoic 5 $\mu$ m | PA:OA    | PA:OA    | PA:OA    |
|-------------|----------|----------|----------|------------------------------------|------------------------------------|------------------------------------|------------------------------------|------------------------------------|------------------------------------|----------|----------|----------|
| <b>Name</b> |          |          |          |                                    |                                    |                                    |                                    |                                    |                                    |          |          |          |
| <b>MMP2</b> | 281,8157 | 205,9315 | 243,8736 | 598,4714                           | 434,2408                           | 516,3561                           | 518,872                            | 553,6958                           | 536,2839                           | 526,0041 | 753,7273 | 639,8657 |
| <b>MMP9</b> | 1,279825 | 0        | 0,639912 | 18,66386                           | 9,333323                           | 13,99859                           | 11,99143                           | 25,45814                           | 18,72478                           | 22,93643 | 61,218   | 42,07721 |

### Metalloproteinase

|               | CTRL     | CTRL     | CTRL     | PA:OA + $\alpha$ -Lipoic 1 $\mu$ m | PA:OA + $\alpha$ -Lipoic 1 $\mu$ m | PA:OA + $\alpha$ -Lipoic 1 $\mu$ m | PA:OA + $\alpha$ -Lipoic 5 $\mu$ m | PA:OA + $\alpha$ -Lipoic 5 $\mu$ m | PA:OA + $\alpha$ -Lipoic 5 $\mu$ m | PA:OA | PA:OA    | PA:OA    |
|---------------|----------|----------|----------|------------------------------------|------------------------------------|------------------------------------|------------------------------------|------------------------------------|------------------------------------|-------|----------|----------|
| <b>Name</b>   |          |          |          |                                    |                                    |                                    |                                    |                                    |                                    |       |          |          |
| <b>CHRN2</b>  | 2,54787  | 2,164352 | 2,356111 | 0                                  | 0,929037                           | 0,464519                           | 2,38725                            | 0,724028                           | 1,555639                           | 0     | 0        | 0        |
| <b>CHRNA2</b> | 0,621812 | 0        | 0,310906 | 2,590847                           | 0                                  | 1,295423                           | 0,728265                           | 0,883501                           | 0,805883                           | 0     | 7,435797 | 3,717899 |

### naChr

| Name   | CTRL     | CTRL     | CTRL     | PA:OA + $\alpha$ -Lipoic 1 $\mu$ m | PA:OA + $\alpha$ -Lipoic 1 $\mu$ m | PA:OA + $\alpha$ -Lipoic 1 $\mu$ m | PA:OA + $\alpha$ -Lipoic 5 $\mu$ m | PA:OA + $\alpha$ -Lipoic 5 $\mu$ m | PA:OA + $\alpha$ -Lipoic 5 $\mu$ m | PA:OA    | PA:OA    | PA:OA    |
|--------|----------|----------|----------|------------------------------------|------------------------------------|------------------------------------|------------------------------------|------------------------------------|------------------------------------|----------|----------|----------|
| ABCC2  | 8862,512 | 7821,283 | 8341,898 | 7696,546                           | 7534,891                           | 7615,718                           | 7978,945                           | 7657,348                           | 7818,146                           | 8236,385 | 8920,618 | 8578,502 |
| ABCC1  | 2882,319 | 3297,355 | 3089,837 | 2275,934                           | 2012,607                           | 2144,27                            | 2348,2                             | 2387,22                            | 2367,71                            | 3185,972 | 2638,282 | 2912,127 |
| KCNK13 | 107,8747 | 108,2523 | 108,0635 | 167,9345                           | 218,2858                           | 193,1102                           | 227,6946                           | 220,6468                           | 224,1707                           | 188,1686 | 382,746  | 285,4573 |
| JUN    | 20,70534 | 7,647246 | 14,17629 | 13,1282                            | 16,41271                           | 14,77046                           | 8,434806                           | 17,90732                           | 13,17106                           | 25,35271 | 10,76523 | 18,05897 |

Others
